# Supplementary material
Source: PubMed Central journal article supplement (PMC2987539)

# Bishydrazide Glycoconjugates for Lectin Recognition and Capture of Bacterial Pathogens

Avijit Kumar Adak, Alexei P. Leonov, Ning Ding, Jyothi Thundimadathil, Sumith

Kularatne, Philip S. Low, and Alexander Wei

## Supporting Information

|                                                                                                                          |     |
|--------------------------------------------------------------------------------------------------------------------------|-----|
| 1. Figure S1 -----                                                                                                       | S1  |
| 2. Figure S2-----                                                                                                        | S2  |
| 3. Figure S3 -----                                                                                                       | S2  |
| 4. Figure S4 -----                                                                                                       | S2  |
| 5. Figure S5 -----                                                                                                       | S3  |
| 6. Figure S6 -----                                                                                                       | S3  |
| 7. NMR spectra of hexa(ethylene glycol)-linked diester -----                                                             | S4  |
| 8. NMR spectra of hexa(ethylene glycol)-linked bishydrazide ( <b>4</b> ) -----                                           | S5  |
| 9. NMR spectra of heptanediol-linked diester -----                                                                       | S6  |
| 10. NMR spectra of heptanediol-linked bishydrazide ( <b>5</b> ) -----                                                    | S7  |
| 11. NMR spectra of lactose–bishydrazide conjugate ( <b>6</b> ) -----                                                     | S8  |
| 12. NMR spectra of pulmonary trisaccharide–bishydrazide conjugate ( <b>7</b> ) --                                        | S9  |
| 13. NMR spectra of heptanediol-linked lactose–bishydrazide conjugate ( <b>9</b> )                                        | S10 |
| 14. NMR spectra of pulmonary trisaccharide intermediate ( <b>12</b> ) -----                                              | S11 |
| 15. NMR spectra of pulmonary trisaccharide intermediate ( <b>13</b> ) -----                                              | S12 |
| 16. NMR spectra of ( $\beta$ -GalNAc(1 $\rightarrow$ 4) $\beta$ -Gal(1 $\rightarrow$ 4) $\beta$ -Glc) ( <b>2</b> ) ----- | S13 |

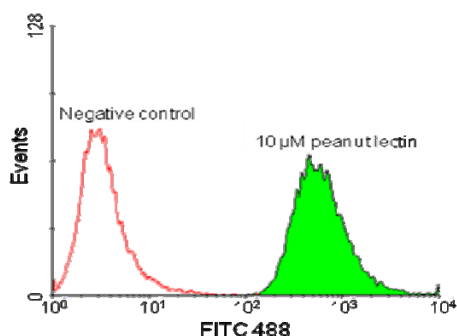

**Figure S1:** Representative data from flow immunocytometry demonstrating peanut lectin binding to microspheres conjugated with lactose–bishydrazide **6** (cf. Figure 3). Positive binding determined by degree of peak overlap between immunolabeled beads and negative control.

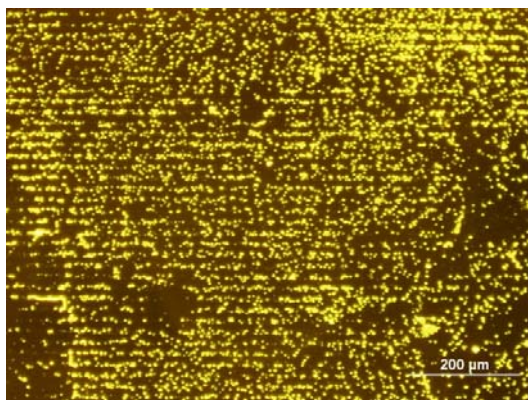

**Figure S2:** Capture of *Pseudomonas* on BSA-coated substrates with photopatterned glycan–bishydrazide–ANB conjugate, imaged by darkfield microscopy. Bacterial capture at  $10^6$  cfu/mL, using pulmonary trisaccharide conjugate **16**.

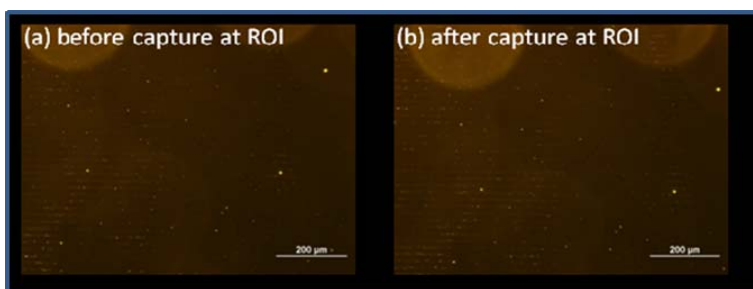

**Figure S3:** Control study showing no *Pseudomonas* capture by substrates patterned with lactose–bishydrazide conjugate. Darkfield images of patterned region of interest (ROI), (a) before and (b) after exposure to *Pseudomonas* for 1 hour at  $10^6$  cfu/mL.

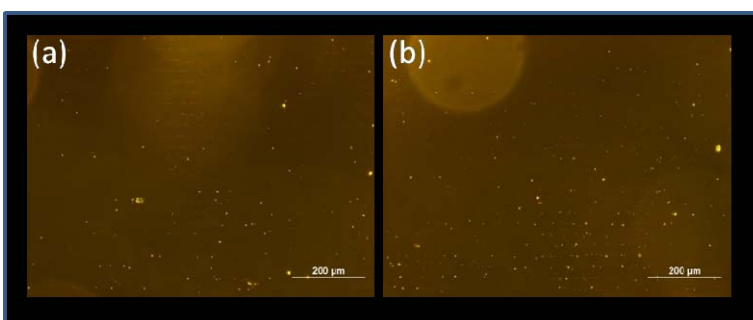

**Figure S4:** Control study showing no capture of UV-irradiated *Pseudomonas* (2 hours,  $\lambda_{\text{max}} = 254$  nm) by substrate patterned with pulmonary trisaccharide–BSA conjugate (**7**–BSA). Darkfield images of patterned ROI, (a) before and (b) after exposure to UV-irradiated *Pseudomonas* ( $10^6$  cfu/mL).

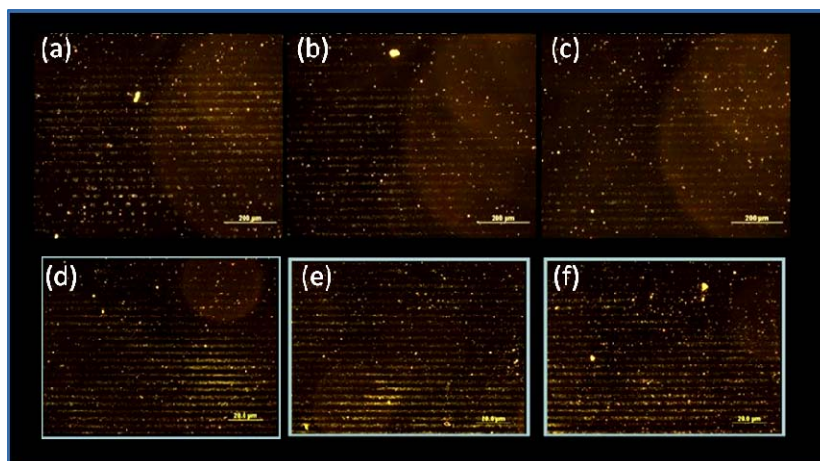

**Figure S5:** Control study showing capture of *Pseudomonas* by substrate patterned with 7-BSA, in the presence of excess lactose (a–c) or GalNAc (d–f). (a) 100 mM lactose; (b) 50 mM lactose; (c) 1 mM lactose; (d) 100 mM GalNAc; (e) 50 mM GalNAc; (f) 1 mM GalNAc.

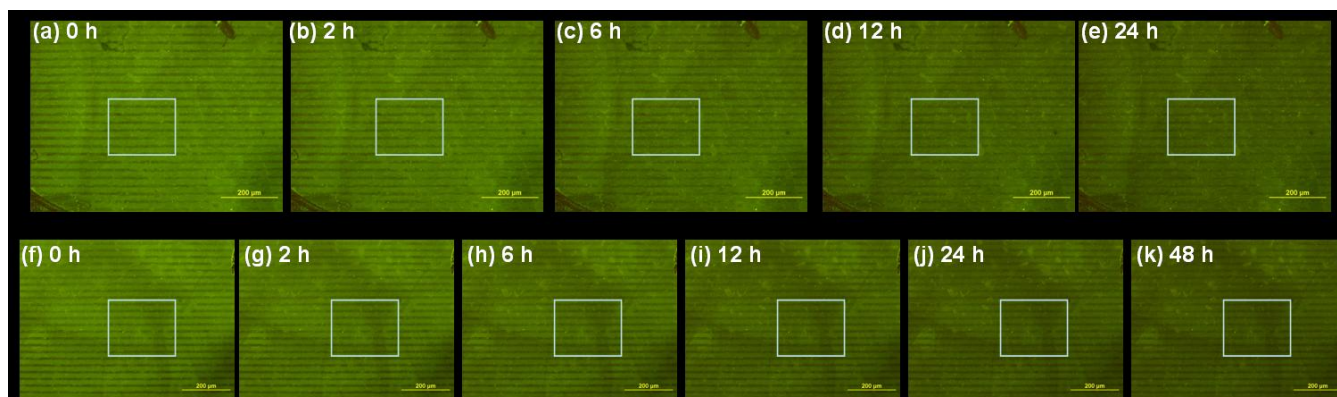

**Figure S6:** Fluorescence microscopy images of the immunocomplexes exposed to different concentration of ME. Top: (a–e) images exposed to 100  $\mu\text{M}$  ME for 2–24 h. Bottom: (f–k) images exposed to 10  $\mu\text{M}$  ME for 2–48h. Square regions (256x256 pixels) in each image were analyzed (by Adobe Photoshop) for changes in luminosities.

# Hexa(ethylene glycol)-linked bis-ethyl(carboxymethyl)ester

<sup>1</sup>H NMR (400 MHz, CDCl<sub>3</sub>)

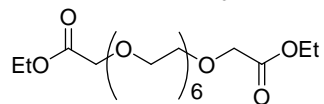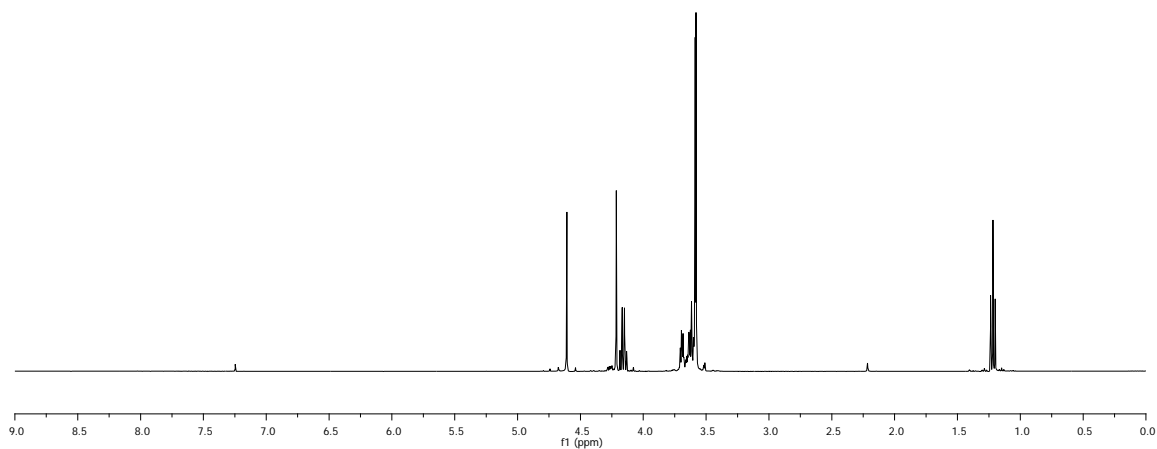

<sup>13</sup>C NMR (100 MHz, CD<sub>3</sub>OD)

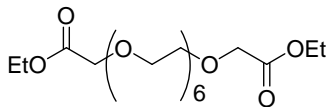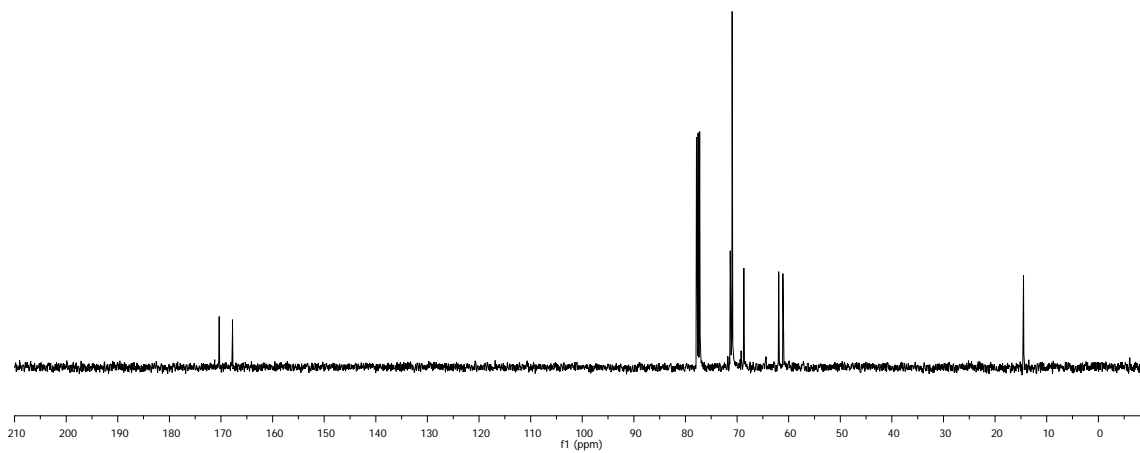

# Hexa(ethylene glycol)-linked bishydrazide (**4**)

<sup>1</sup>H NMR (400 MHz, CDCl<sub>3</sub>)

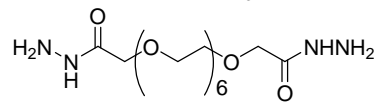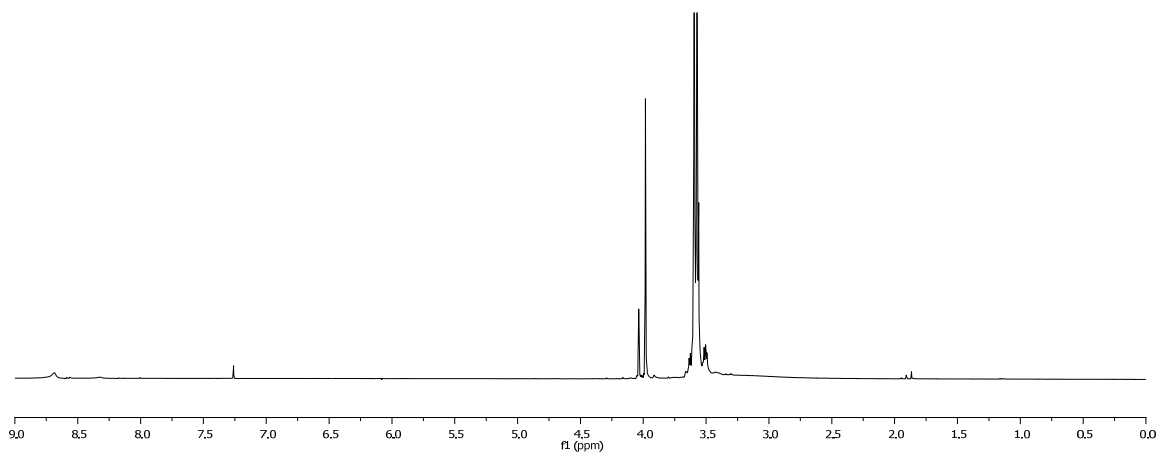

<sup>13</sup>C NMR (100 MHz, CD<sub>3</sub>OD)

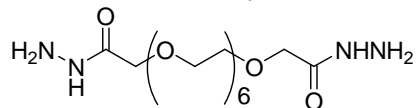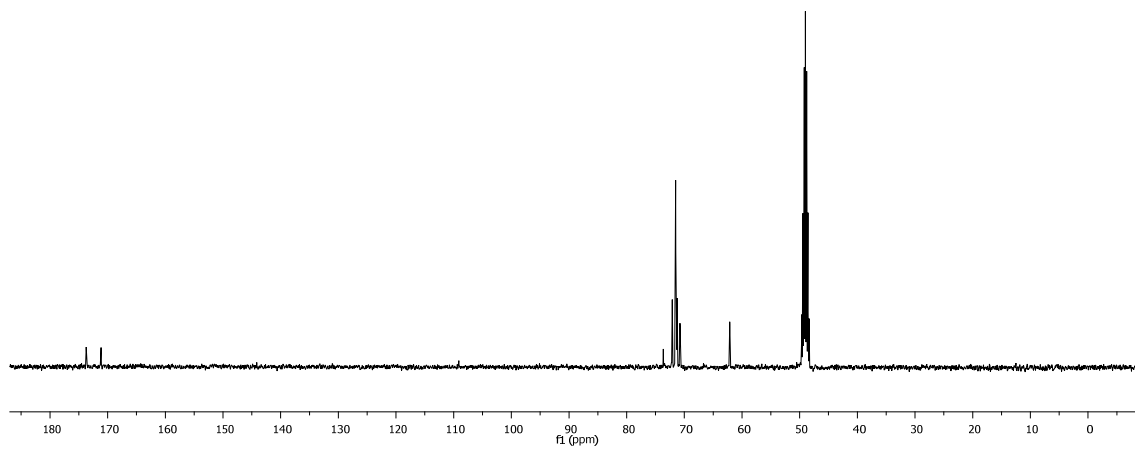

# Heptanediol-linked bis-ethyl(carboxymethyl)ester

<sup>1</sup>H NMR (400 MHz, CDCl<sub>3</sub>)

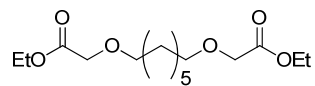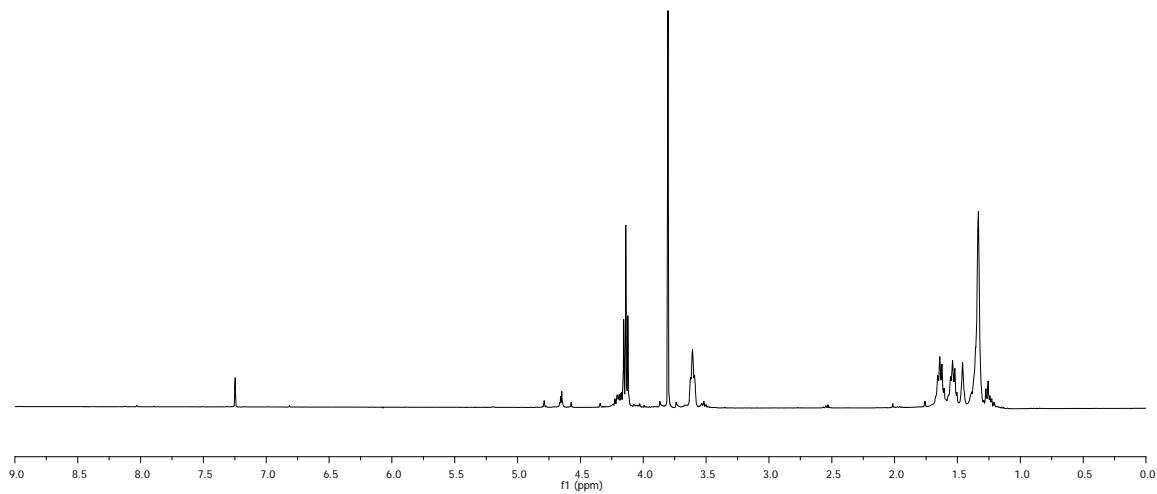

<sup>13</sup>C NMR (100 MHz, CDCl<sub>3</sub>)

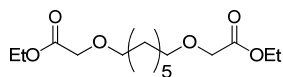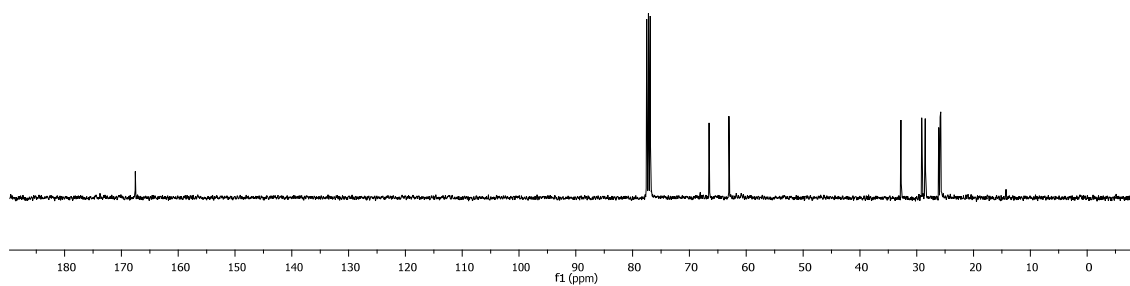

## Heptanediol-linked bishydrazide (**7**)

<sup>1</sup>H NMR (400 MHz, CDCl<sub>3</sub>)

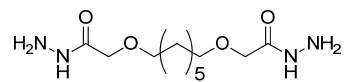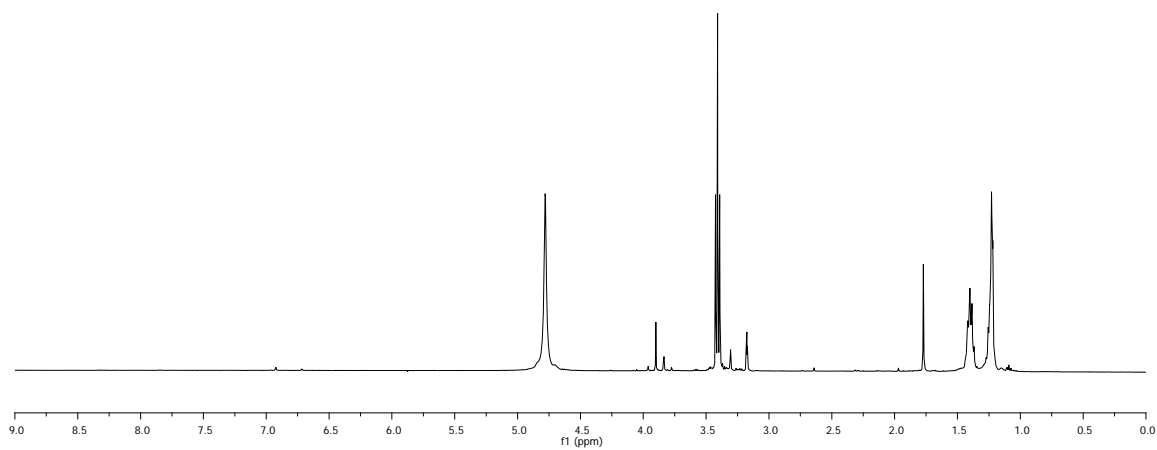

<sup>13</sup>C NMR (100 MHz, CDCl<sub>3</sub>)

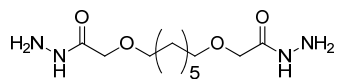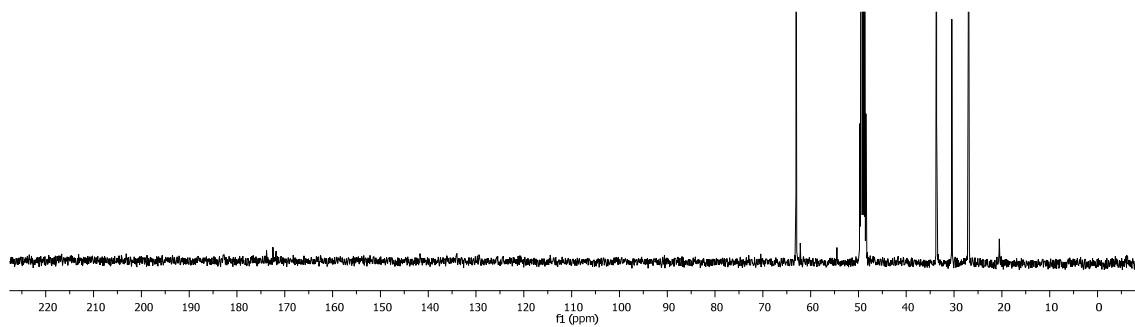

# Lactose–bishydrazide conjugate (6)

<sup>1</sup>H NMR (400 MHz, CD<sub>3</sub>OD)

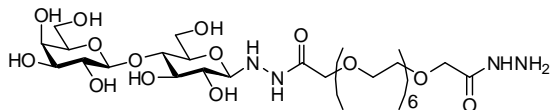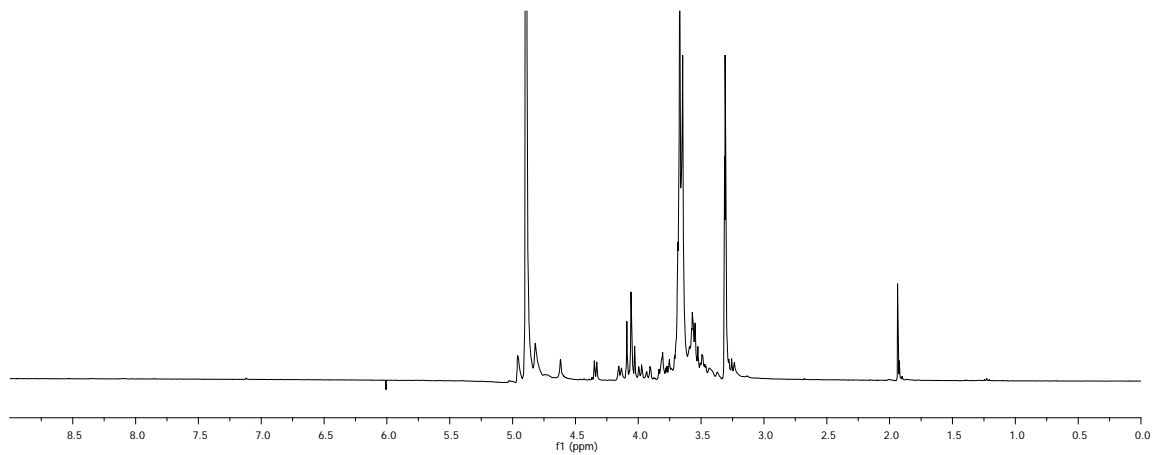

<sup>13</sup>C NMR (100 MHz, CD<sub>3</sub>OD)

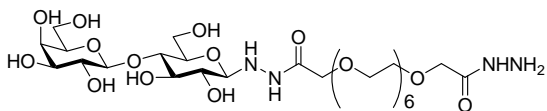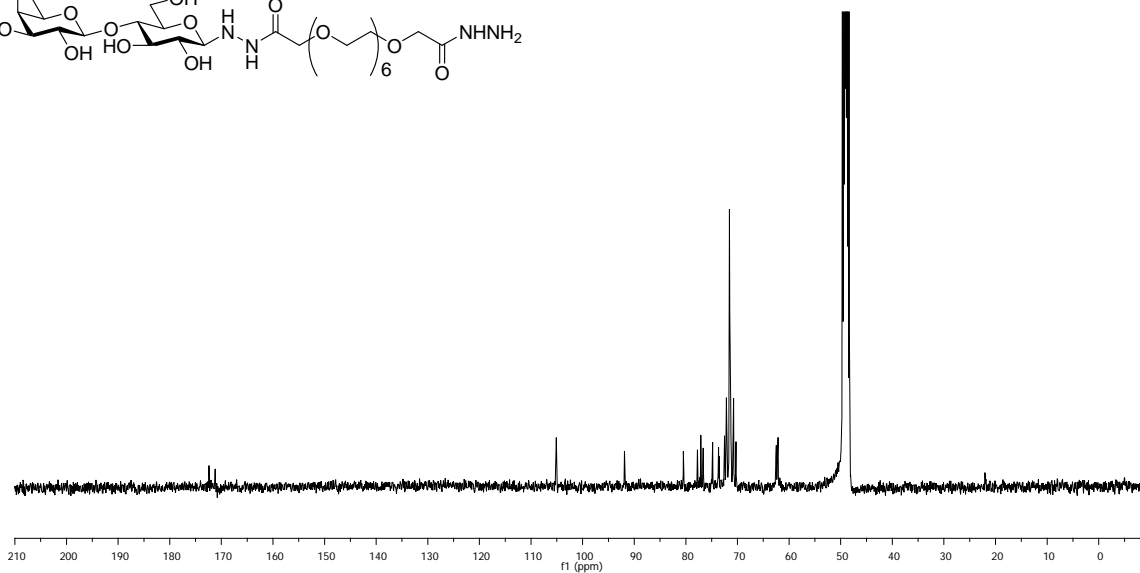





# Heptanediol-linked lactose-bishydrazide conjugate (9)

<sup>1</sup>H NMR (400 MHz, D<sub>2</sub>O)

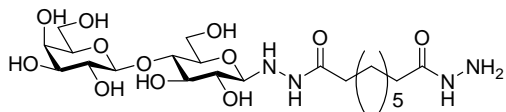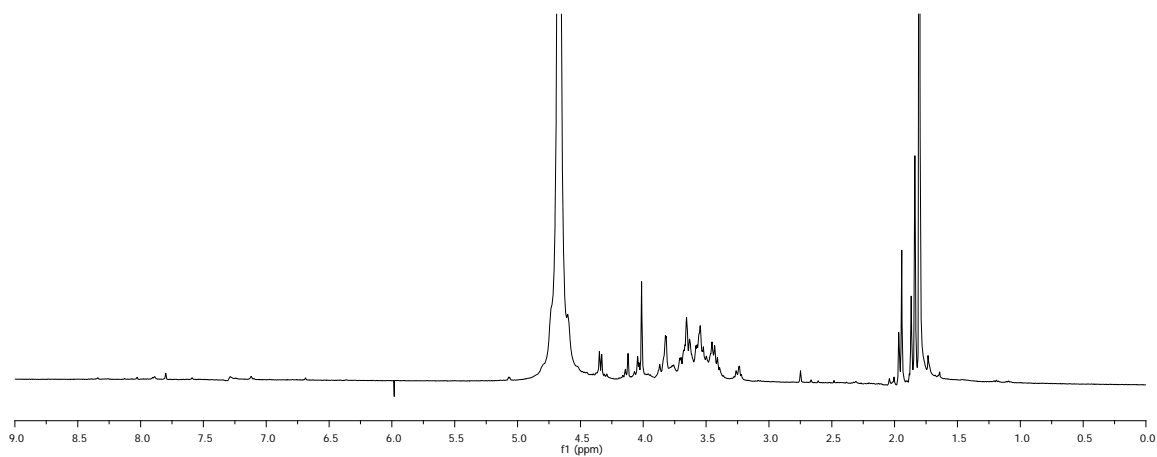

<sup>13</sup>C NMR (100 MHz, D<sub>2</sub>O)

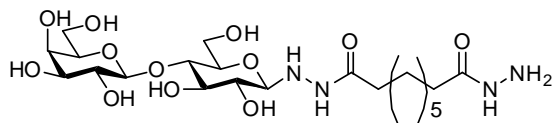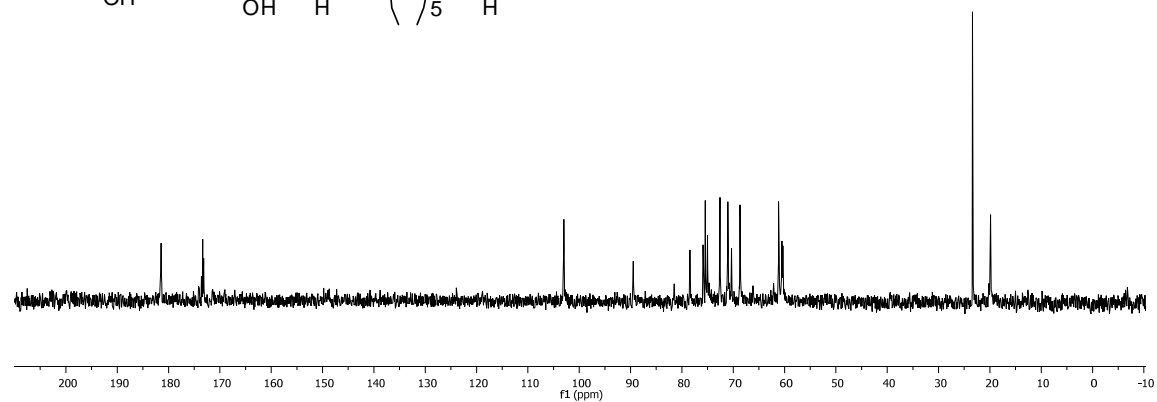

Pulmonary trisaccharide ( $\beta$ -GalNAc(1 $\rightarrow$ 4)  $\beta$ -Gal(1 $\rightarrow$ 4) $\beta$ -Glc), trichloroacetamide (**12**)

$^1\text{H}$  NMR (400 MHz,  $\text{CDCl}_3$ )

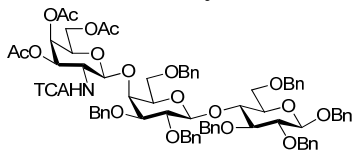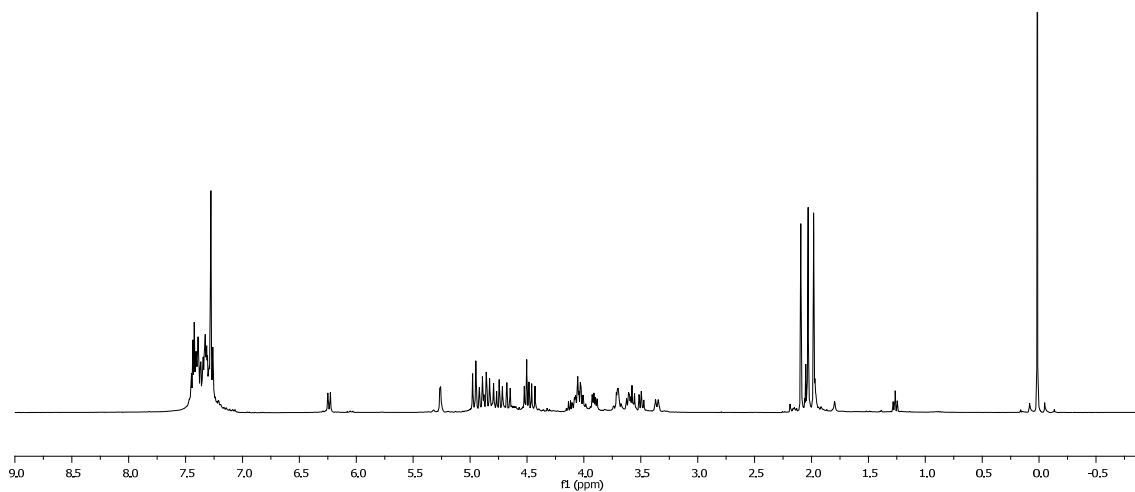

$^{13}\text{C}$  NMR (100 MHz,  $\text{CDCl}_3$ )

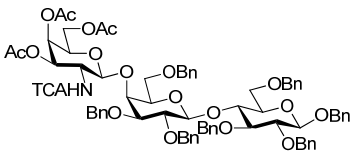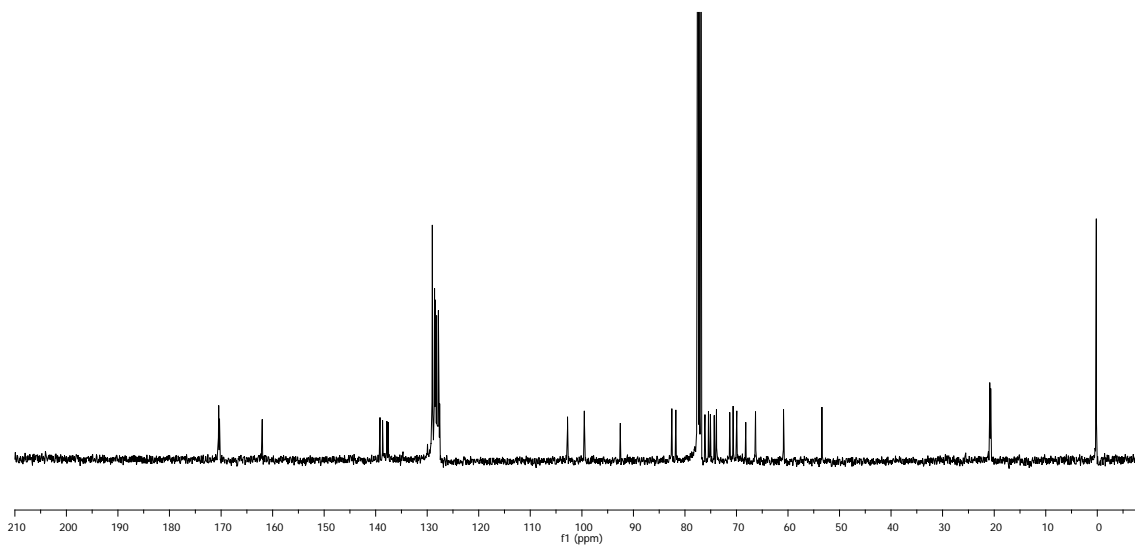

Pulmonary trisaccharide ( $\beta$ -GalNAc(1 $\rightarrow$ 4)  $\beta$ -Gal(1 $\rightarrow$ 4) $\beta$ -Glc), protected derivative (**13**)

$^1\text{H}$  NMR (400 MHz,  $\text{CDCl}_3$ )

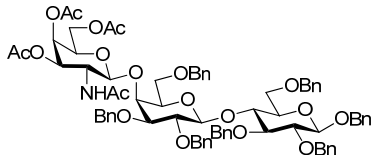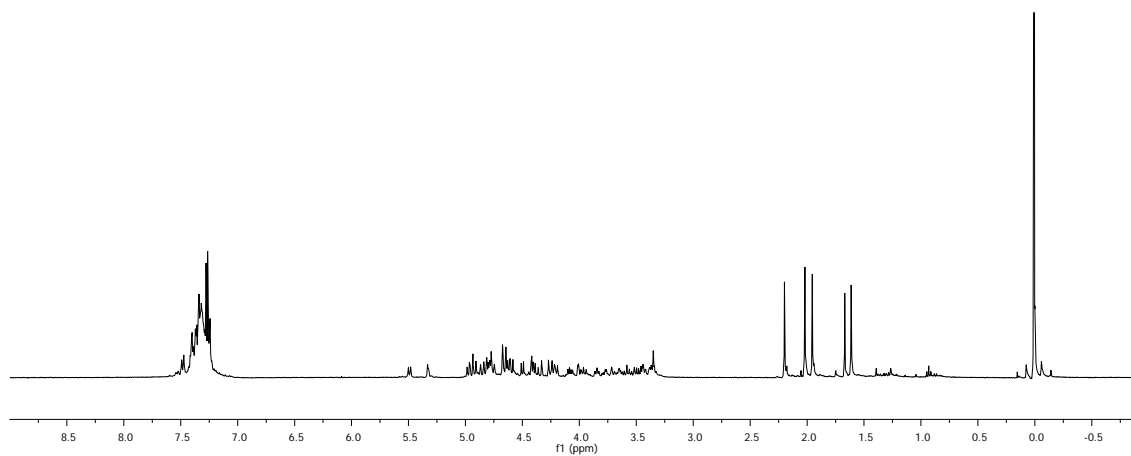

$^{13}\text{C}$  NMR (100 MHz,  $\text{CDCl}_3$ )

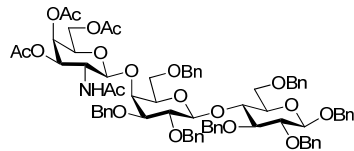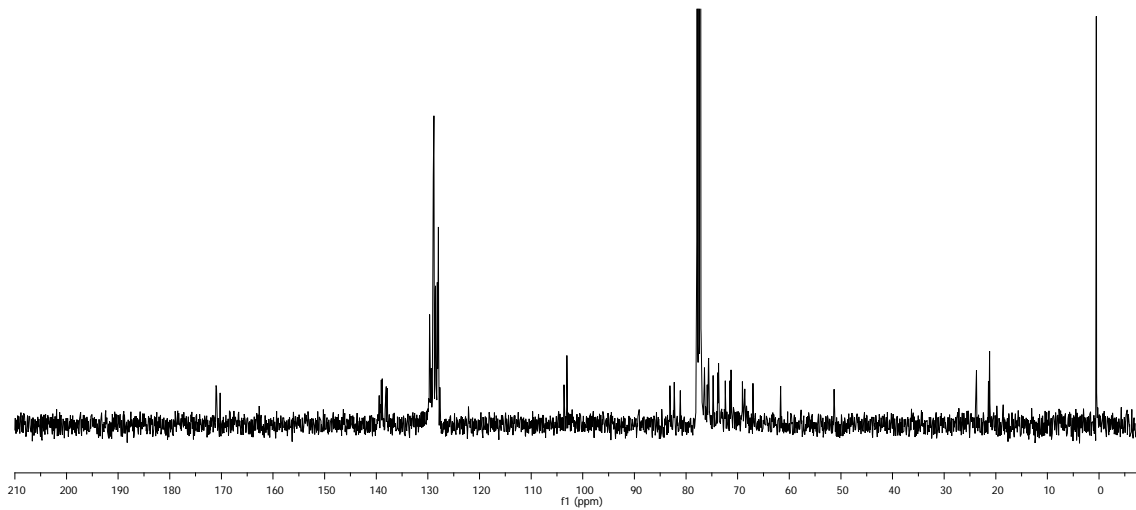

Pulmonary trisaccharide ( $\beta$ -GalNAc(1 $\rightarrow$ 4)  $\beta$ -Gal(1 $\rightarrow$ 4) $\beta$ -Glc) (2)

$^1\text{H}$  NMR (400 MHz,  $\text{CD}_3\text{OD}$ )

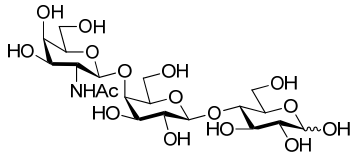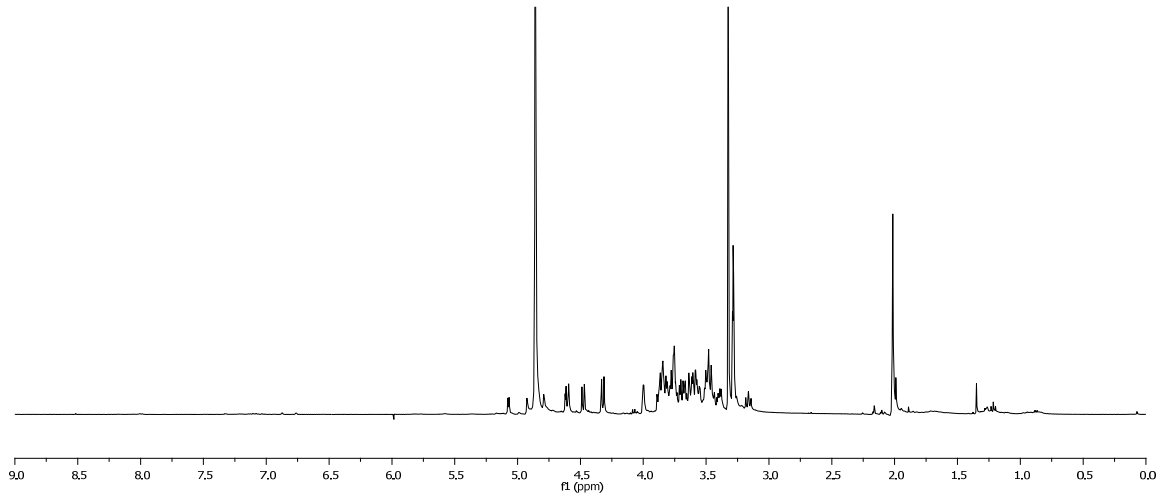

$^{13}\text{C}$  NMR (100 MHz,  $\text{CD}_3\text{OD}$ )

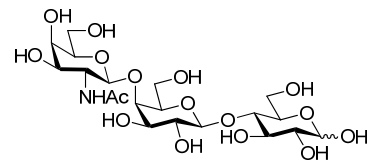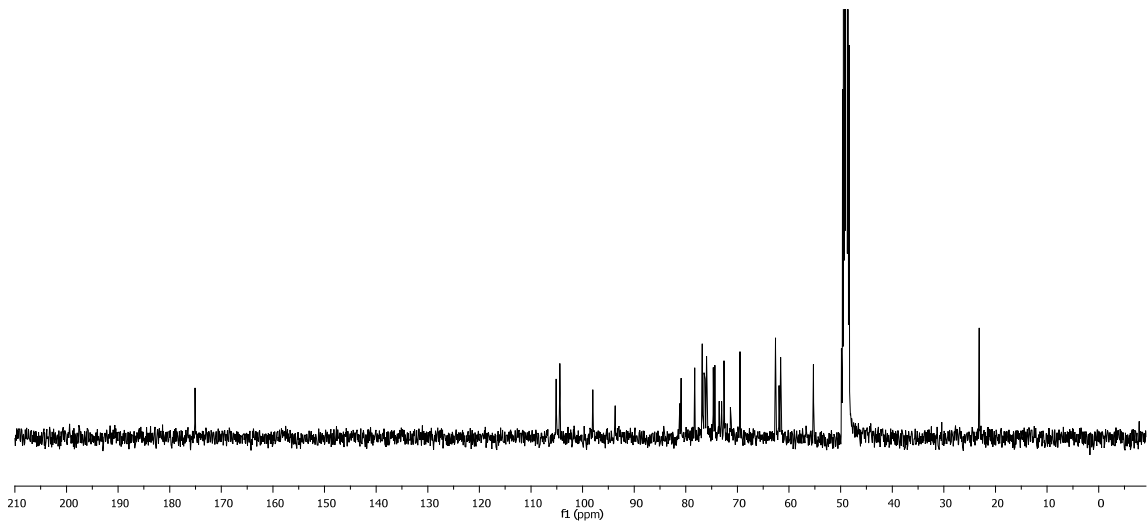

Supplement: NIHMS243387-supplement-1_si_001.pdf [file NIHMS243387-supplement-1_si_001.pdf]
